# Supplementary material for: Factors Related to Breastfeeding Support in Lebanese Daycare Centers: A Qualitative Study among Daycare Directors and Employees
Source: MDPI journal article supplement (doi:10.3390/ijerph18126205), 2021-06-08

Figure S2 – Coding tree for employees' interviews

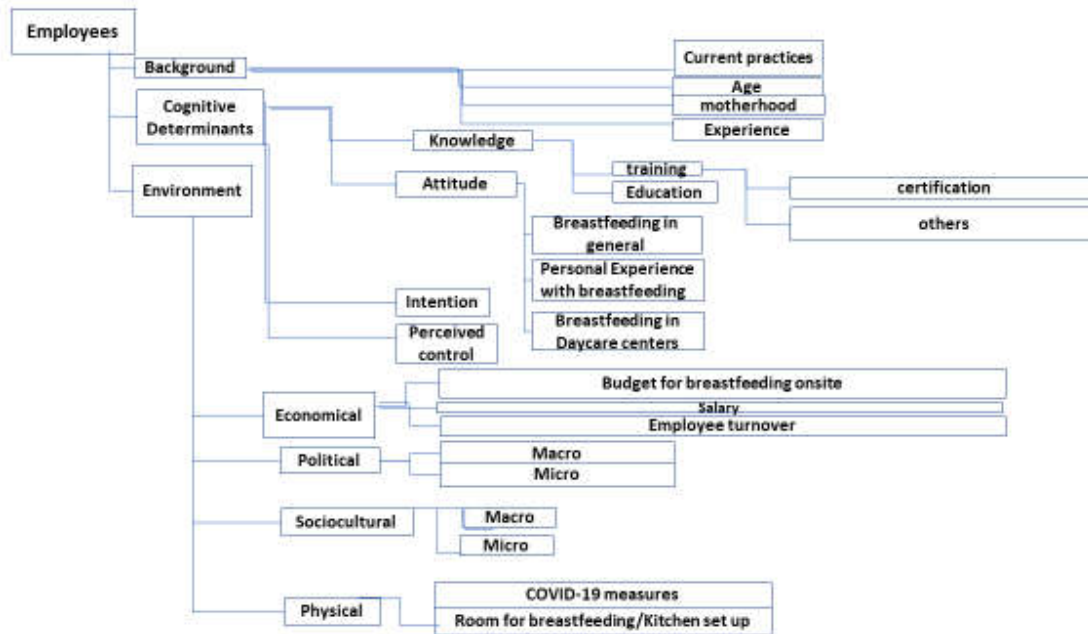

Figure S3- Coding tree for directors' interviews (BF=breastfeeding)

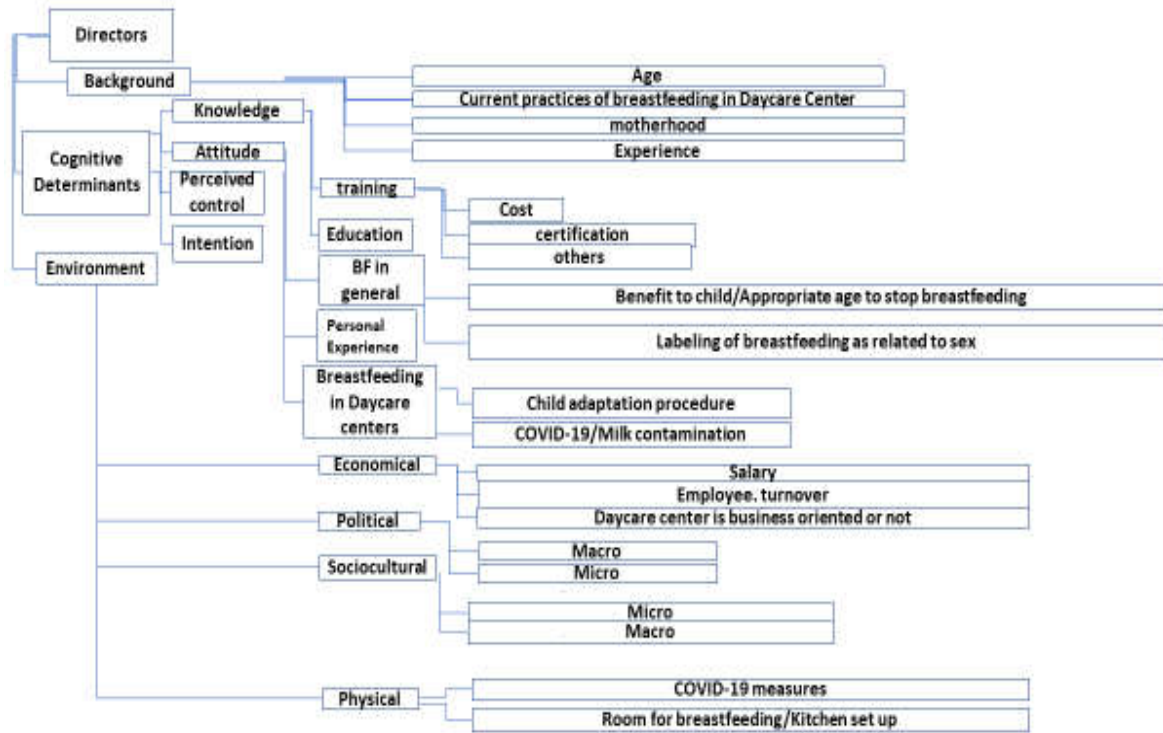

Supplement: s1 [file s1]
