# Supplementary figures and images for: Factors Related to Breastfeeding Support in Lebanese Daycare Centers: A Qualitative Study among Daycare Directors and Employees
Source: MDPI journal article supplement (doi:10.3390/ijerph18126205), 2021-06-08

Figure S1 Conceptual framework

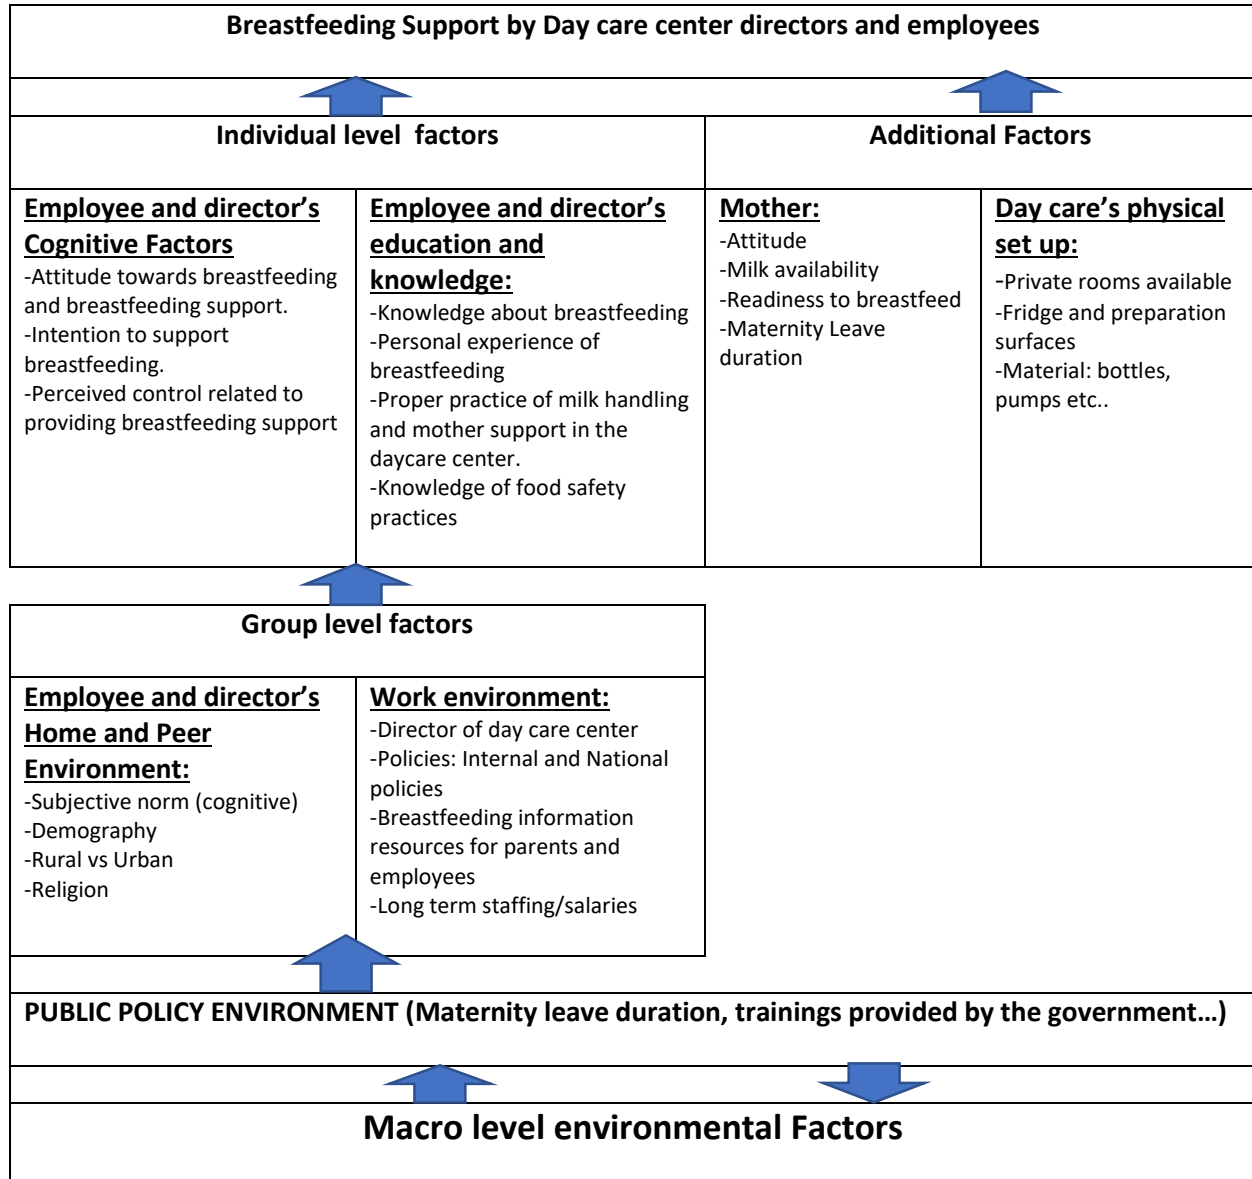

Supplement: s1 [file s1]
